# Supplementary material for: Introducing intramolecular, interligand arene–alkynyl π-interactions into heteroleptic [Cu(N^N)(P^P)]+complexes
Source: Royal Society of Chemistry journal article supplement (doi:10.1039/d3ce00355h), 2023-01-01
Supplement: d3ce00355h1.pdf [file d3ce00355h1.pdf]

## Supplementary Material

### Introducing intramolecular, interligand arene–alkynyl $\pi$ -interactions into heteroleptic $[\text{Cu}(\text{N}^{\wedge}\text{N})(\text{P}^{\wedge}\text{P})]^+$ complexes

Deyanira Gejsnæs-Schaad, Marco Meyer, Alessandro Prescimone, Catherine E. Housecroft\* and Edwin C. Constable

#### Contents:

Scheme S1

Figures S1–S12. NMR spectra of ligands **1–3**

Figures S13–S30. NMR spectra of the copper(I) coordination compounds.

Table S1

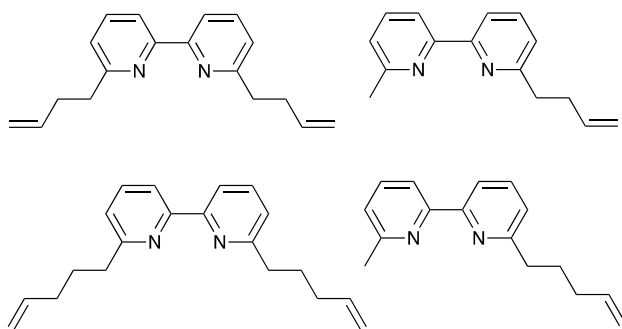

Scheme S1. Structures of previously published  $\text{N}^{\wedge}\text{N}$  ligands 6,6'-bis(but-3-en-1-yl)-2,2'-bipyridine, 6-(but-3-en-1-yl)-6'-methyl-2,2'-bipyridine, 6,6'-bis(pent-4-en-1-yl)-2,2'-bipyridine or 6-(pent-4-en-1-yl)-6'-methyl-2,2'-bipyridine.

Reference: J. Wöhler, M. Meyer, A. Prescimone, E.C. Constable and C.E. Housecroft, *Dalton Trans.*, 2022, **51**, 13094.

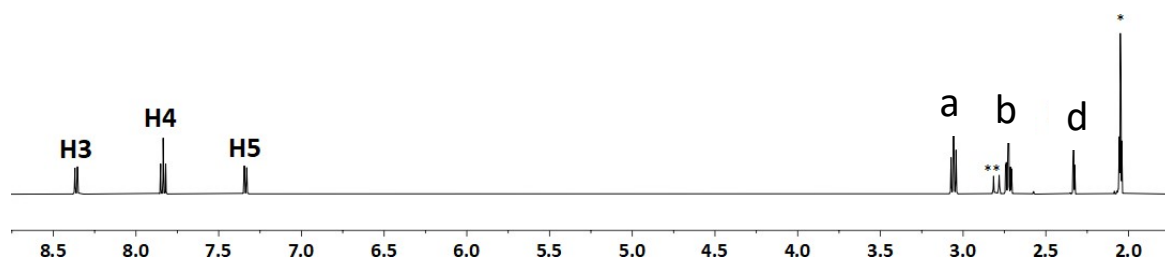

Fig. S1.  $^1\text{H}$  NMR spectrum of **1**. (500 MHz, 298 K, acetone- $d_6$ ). Scale given in  $\delta$  / ppm. \* = residual acetone- $d_5$ ; \*\* =  $\text{H}_2\text{O}$  and HOD.

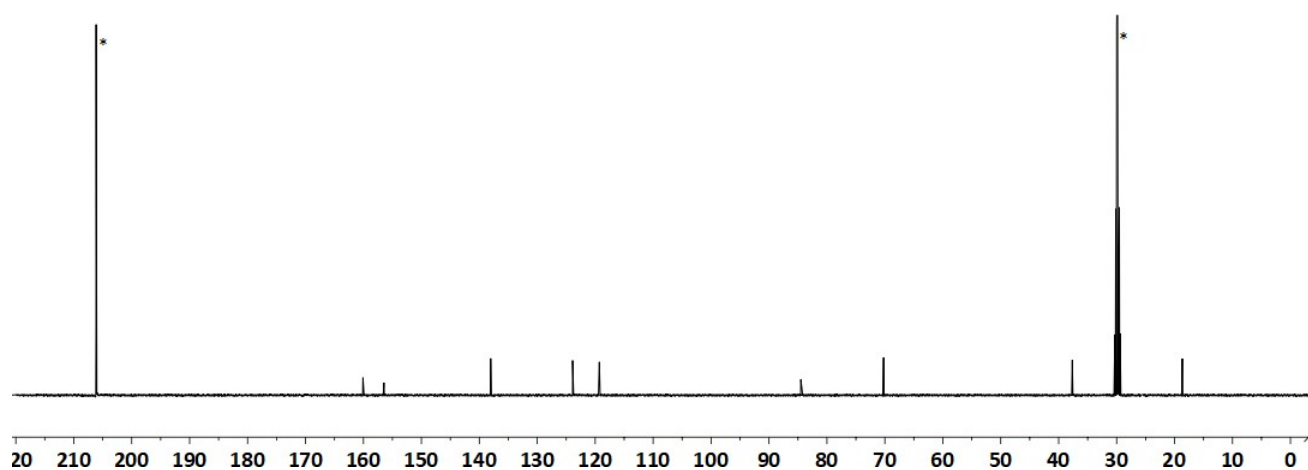

Fig. S2.  $^{13}\text{C}\{^1\text{H}\}$  NMR spectrum of **1**. (126 MHz, 298 K, acetone- $d_6$ ). Scale given in  $\delta$  / ppm. \* = acetone- $d_6$ .

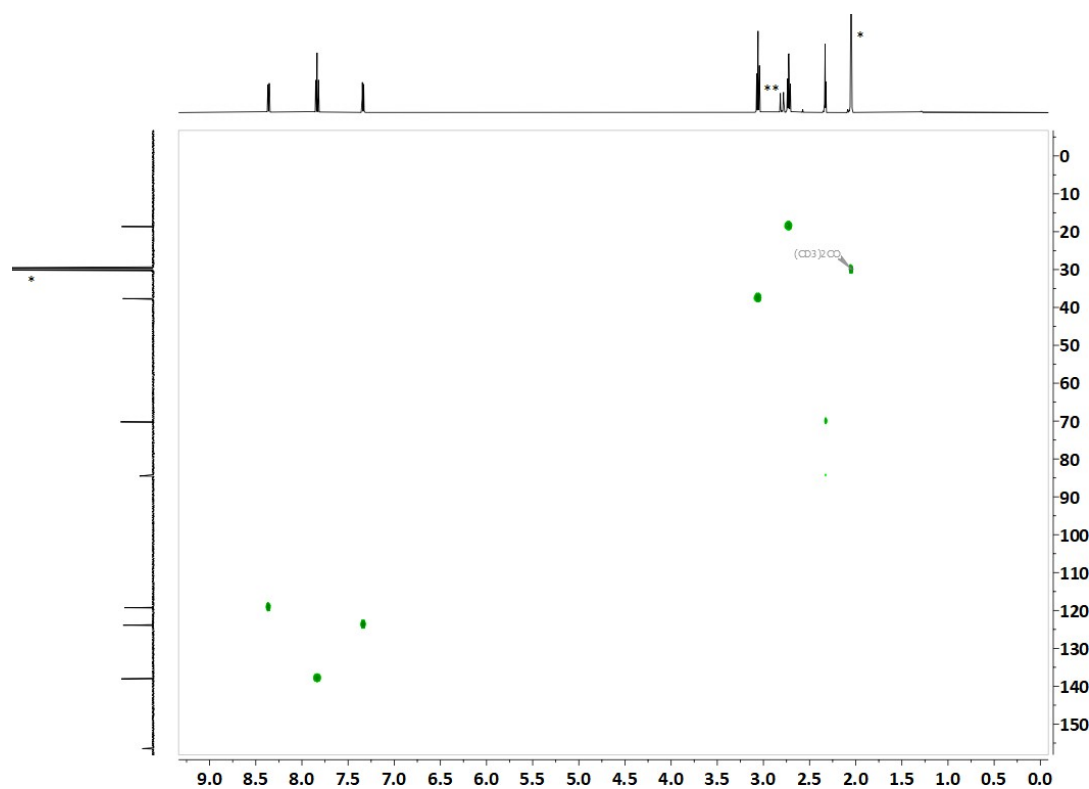

Fig. S3. HMBC spectrum of **1**. (500 MHz  $^1\text{H}$ , 126 MHz  $^{13}\text{C}\{^1\text{H}\}$ , 298 K, acetone- $d_6$ ). \* = acetone- $d_6$  (in  $^{13}\text{C}\{^1\text{H}\}$ ) or residual acetone- $d_5$  (in  $^1\text{H}$ ); \*\* =  $\text{H}_2\text{O}$ .

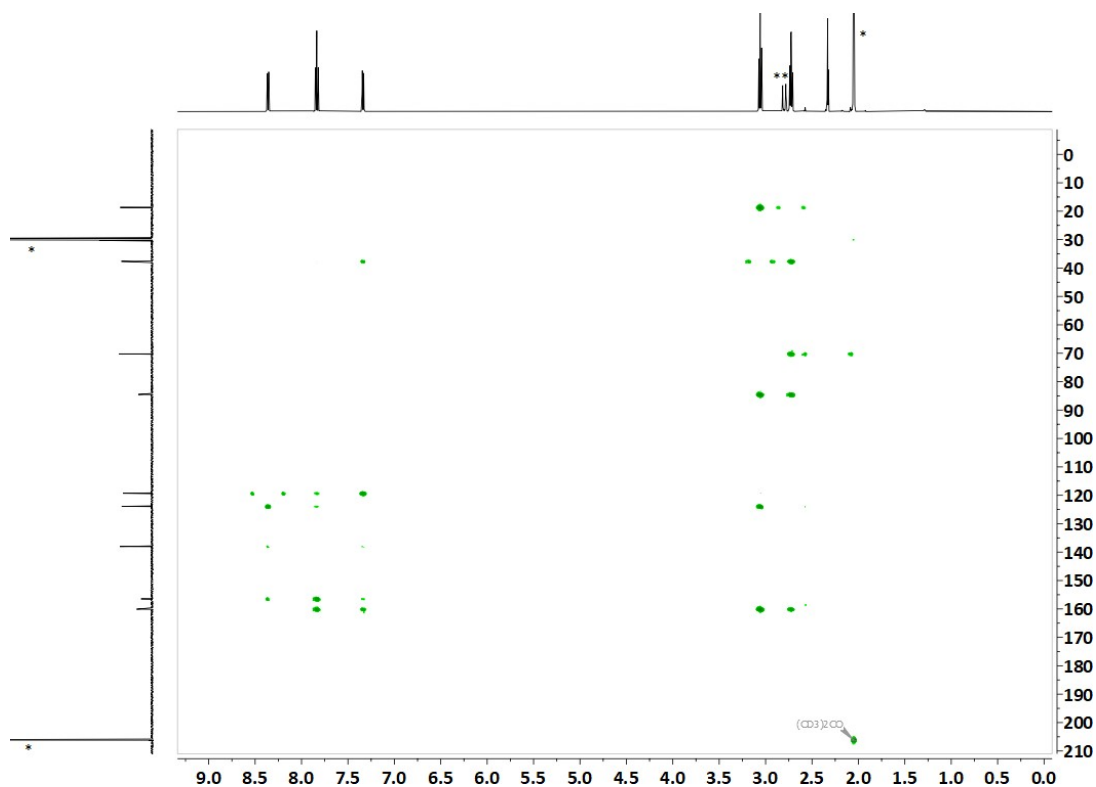

Fig. S4. HMBC spectrum of **1**. (500 MHz  $^1\text{H}$ , 126 MHz  $^{13}\text{C}\{^1\text{H}\}$ , 298 K, acetone- $d_6$ ). \* = acetone- $d_6$  (in  $^{13}\text{C}\{^1\text{H}\}$ ) or residual acetone- $d_5$  (in  $^1\text{H}$ ); \*\* =  $\text{H}_2\text{O}$ .

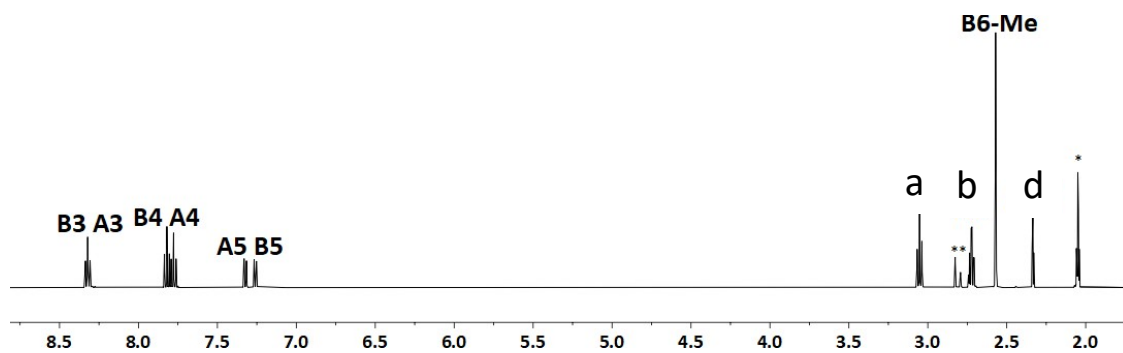

Fig. S5.  $^1\text{H}$  NMR spectrum of **2**. (500 MHz, 298 K, acetone- $d_6$ ). Scale given in  $\delta$  / ppm. \* = residual acetone- $d_5$ ; \*\* =  $\text{H}_2\text{O}$  and HOD.

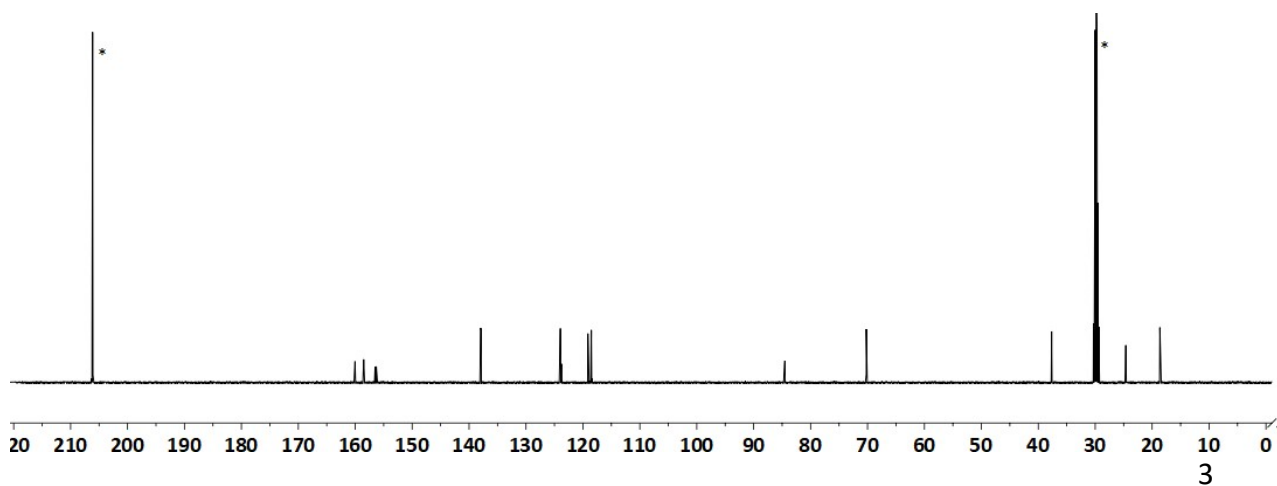

Fig. S6.  $^{13}\text{C}\{^1\text{H}\}$  NMR spectrum of **2**. (126 MHz, 298 K, acetone- $d_6$ ). Scale given in  $\delta$  / ppm. \* = acetone- $d_6$ .

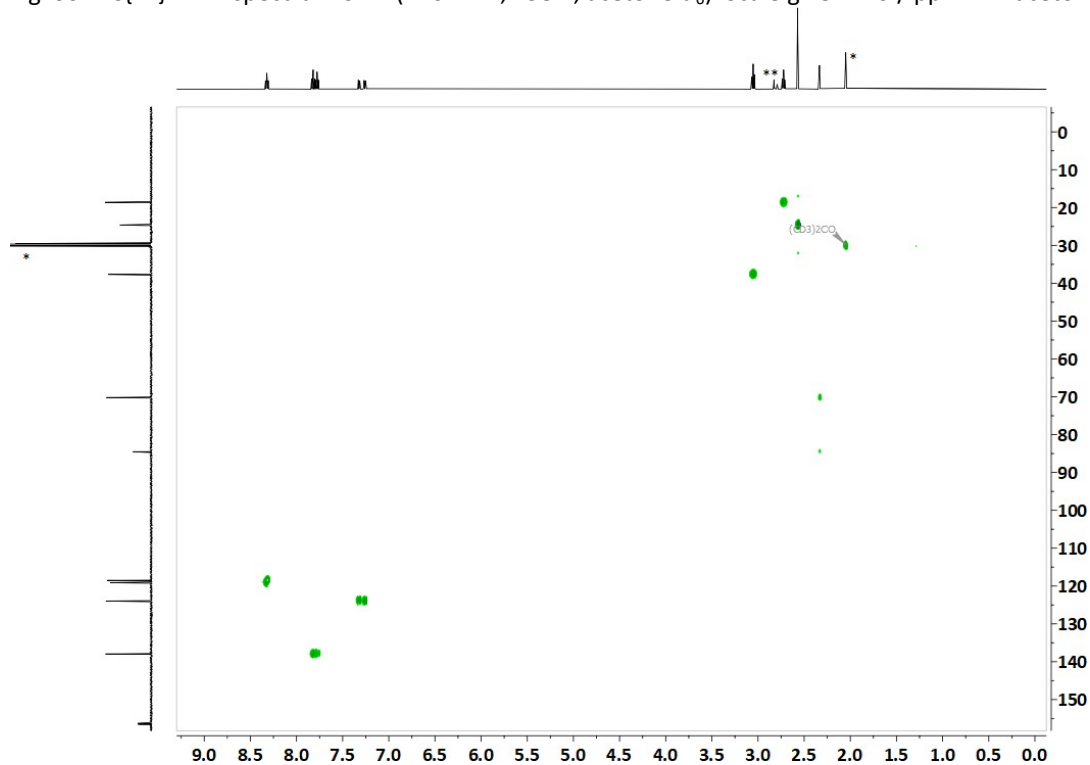

Fig. S7. HMQC spectrum of **2**. (500 MHz  $^1\text{H}$ , 126 MHz  $^{13}\text{C}\{^1\text{H}\}$ , 298 K, acetone- $d_6$ ). \* = acetone- $d_6$  (in  $^{13}\text{C}\{^1\text{H}\}$ ) or residual acetone- $d_5$  (in  $^1\text{H}$ ); \*\* =  $\text{H}_2\text{O}$ .

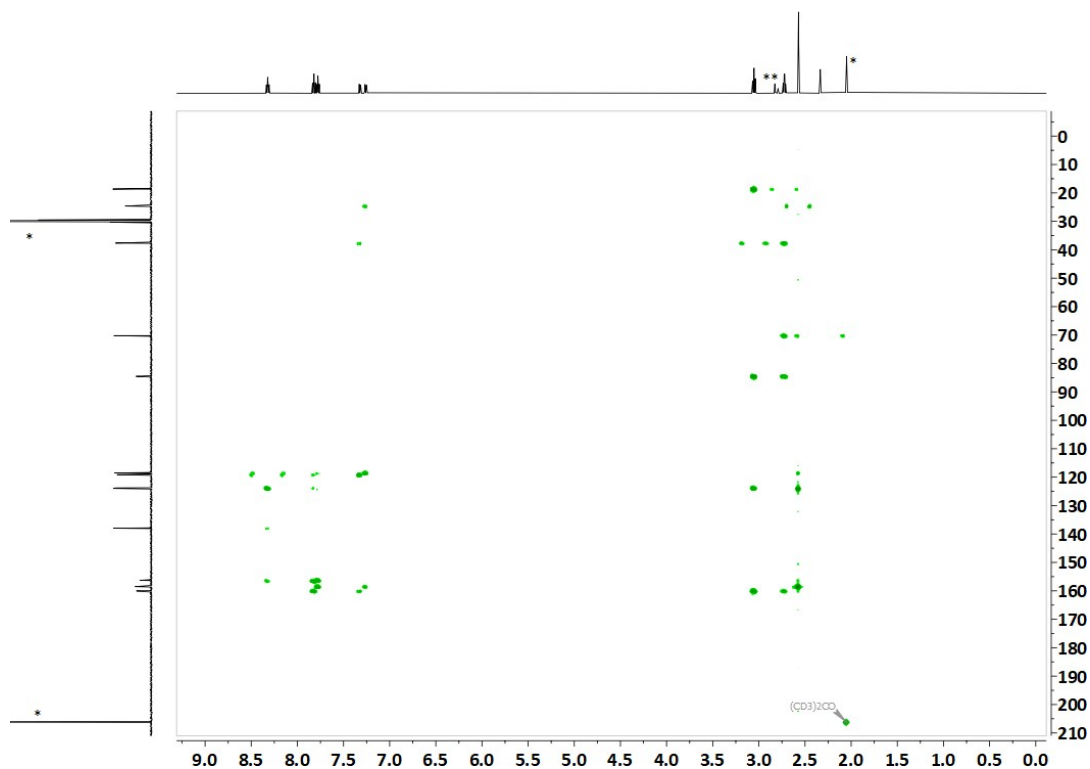

Fig. S8. HMBC spectrum of **2**. (500 MHz  $^1\text{H}$ , 126 MHz  $^{13}\text{C}\{^1\text{H}\}$ , 298 K, acetone- $d_6$ ). \* = acetone- $d_6$  (in  $^{13}\text{C}\{^1\text{H}\}$ ) or residual acetone- $d_5$  (in  $^1\text{H}$ ); \*\* =  $\text{H}_2\text{O}$ .

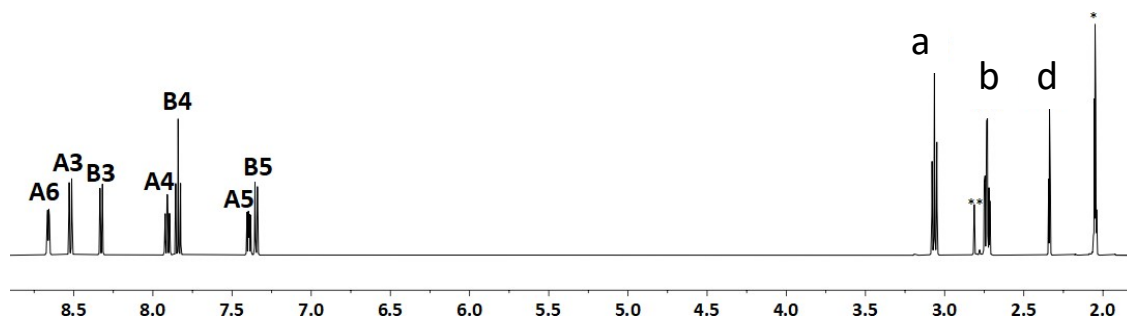

Fig. S9.  $^1\text{H}$  NMR spectrum of **3**. (500 MHz, 298 K, acetone- $d_6$ ). Scale given in  $\delta$  / ppm. \* = residual acetone- $d_5$ ; \*\* =  $\text{H}_2\text{O}$  and HOD.

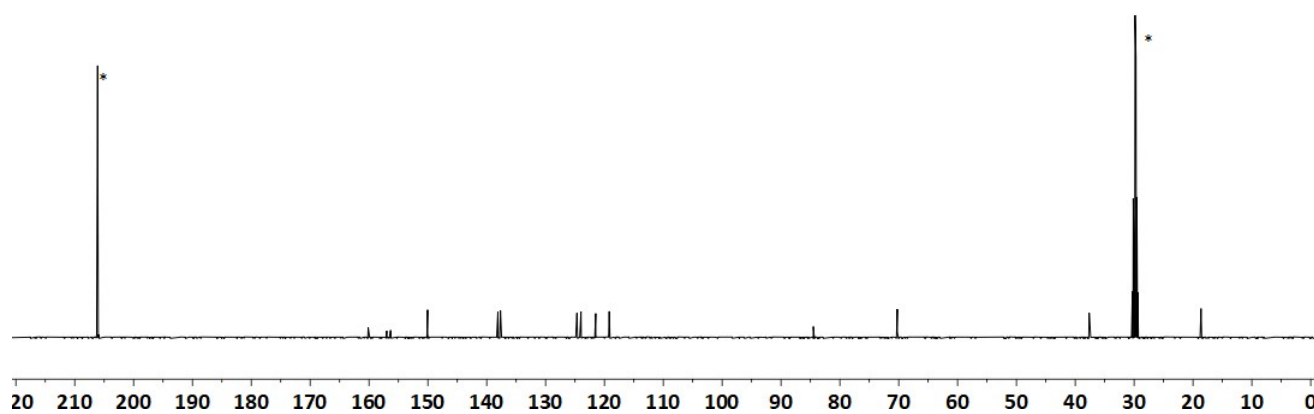

Fig. S10.  $^{13}\text{C}\{^1\text{H}\}$  NMR spectrum of **3**. (126 MHz, 298 K, acetone- $d_6$ ). Scale given in  $\delta$  / ppm. \* = acetone- $d_6$ .

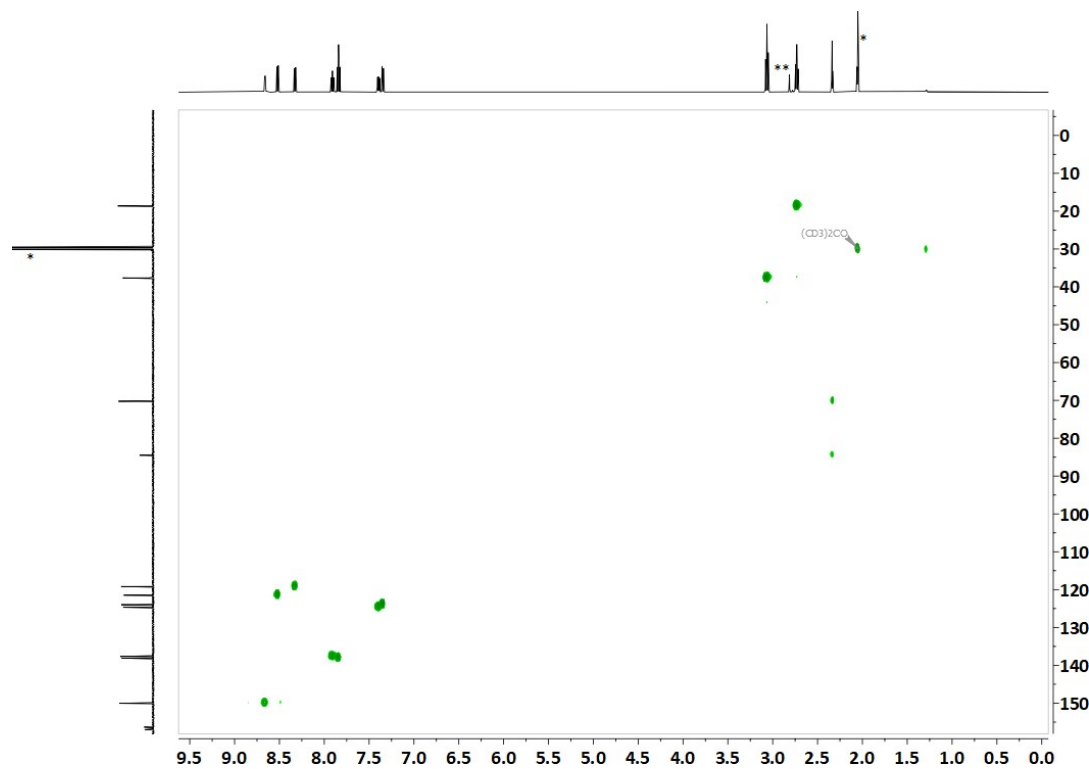

Fig. S11. HMQC spectrum of **3**. (500 MHz  $^1\text{H}$ , 126 MHz  $^{13}\text{C}\{^1\text{H}\}$ , 298 K, acetone- $d_6$ ). \* = acetone- $d_6$  (in  $^{13}\text{C}\{^1\text{H}\}$ ) or residual acetone- $d_5$  (in  $^1\text{H}$ ); \*\* =  $\text{H}_2\text{O}$ .

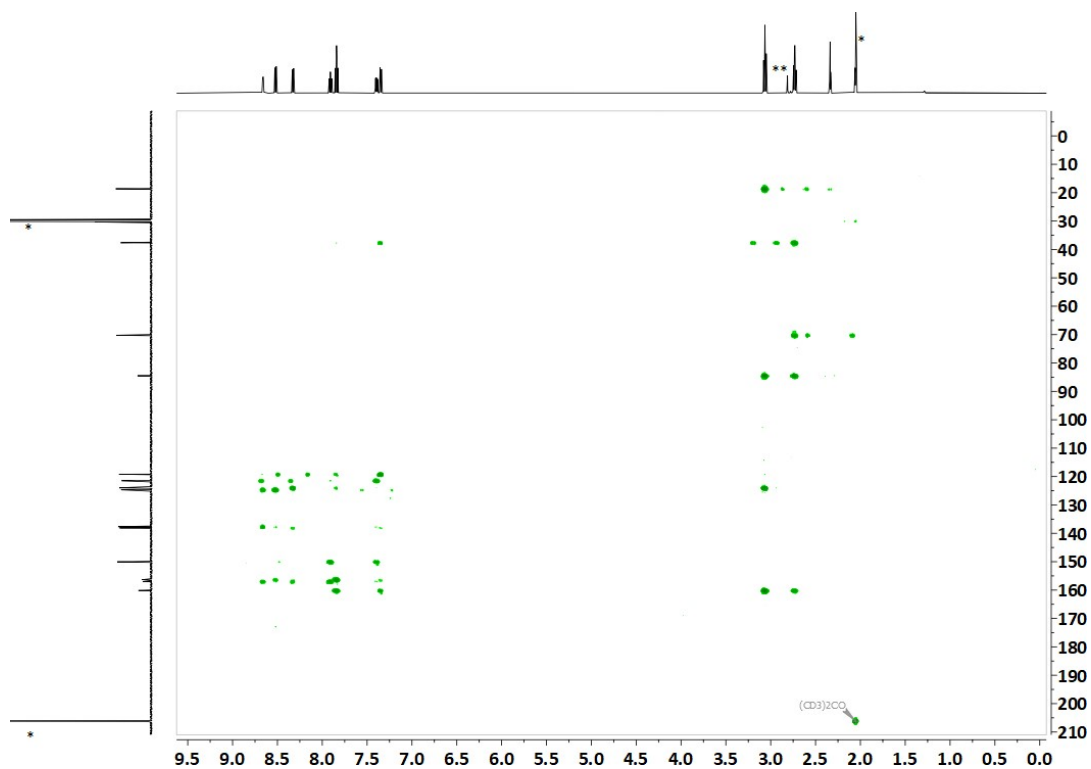

Fig. S12. HMBC spectrum of **3**. (500 MHz  $^1\text{H}$ , 126 MHz  $^{13}\text{C}\{^1\text{H}\}$ , 298 K, acetone- $d_6$ ). \* = acetone- $d_6$  (in  $^{13}\text{C}\{^1\text{H}\}$ ) or residual acetone- $d_5$  (in  $^1\text{H}$ ); \*\* =  $\text{H}_2\text{O}$ .

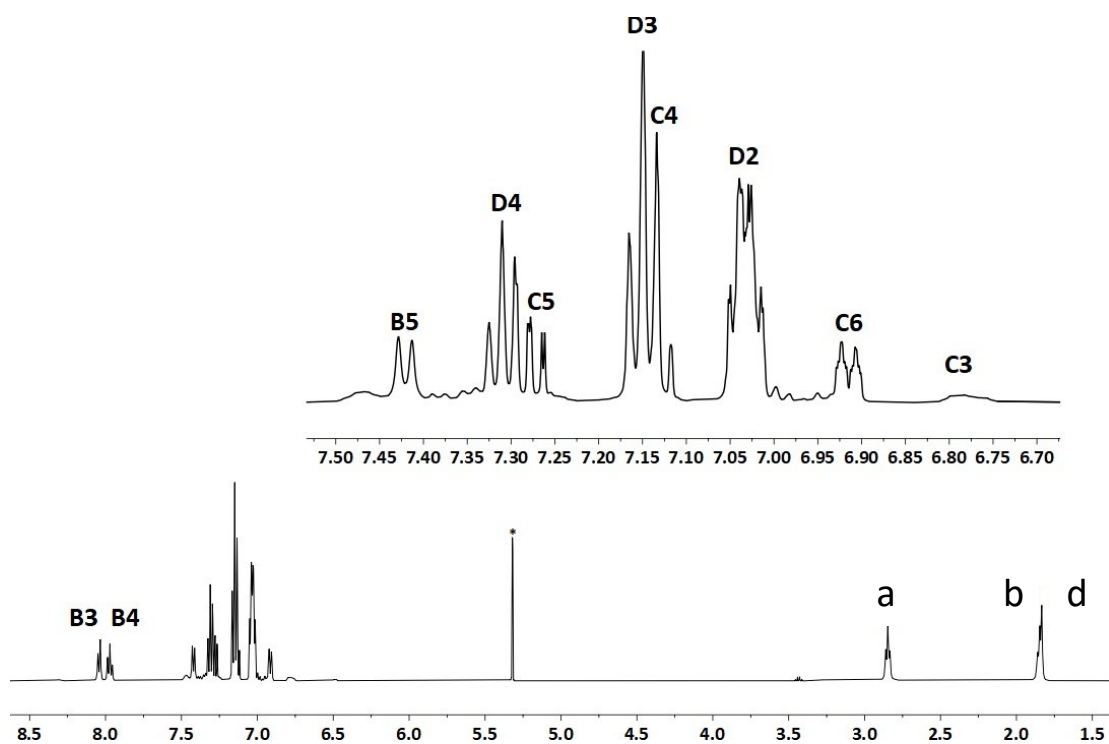

Fig. S13.  $^1\text{H}$  NMR spectrum (500 MHz, 298 K,  $\text{CD}_2\text{Cl}_2$ ) of  $[\text{Cu}(\text{POP})(\mathbf{1})][\text{PF}_6]$ . Scale given in  $\delta$  / ppm. \* = residual  $\text{CH}_2\text{Cl}_2$ .

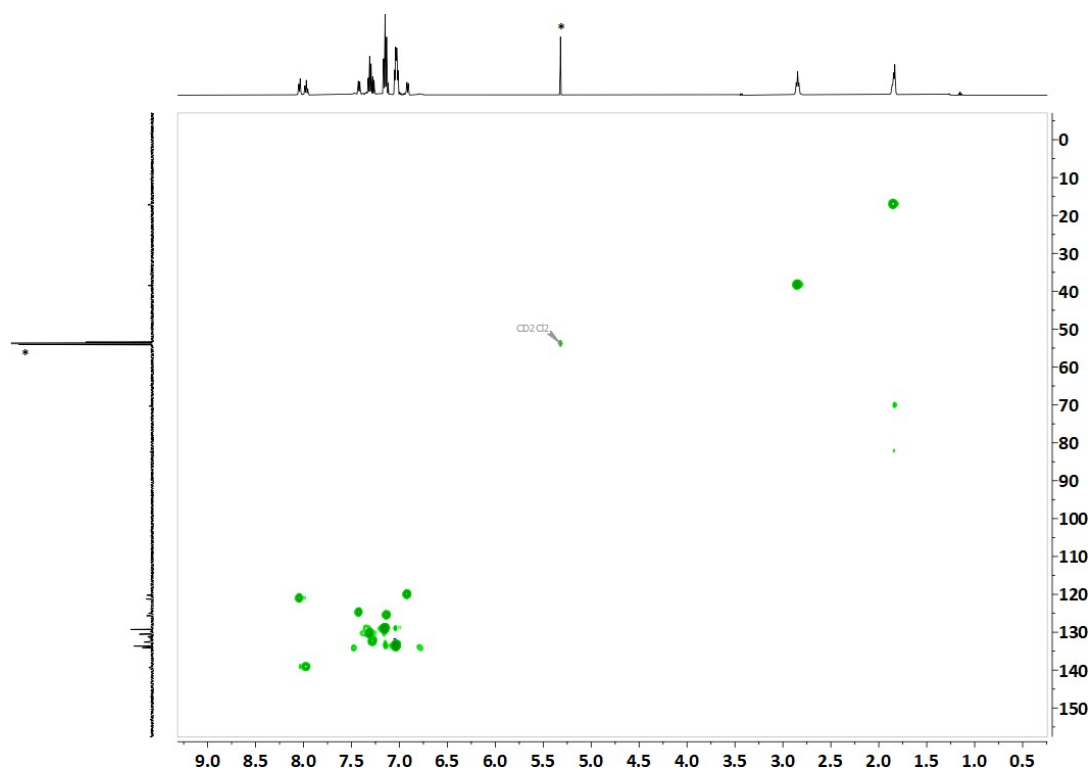

Fig. S14. HMQC spectrum of [Cu(POP)(1)][PF<sub>6</sub>]. (500 MHz <sup>1</sup>H, 126 MHz <sup>13</sup>C{<sup>1</sup>H}, 298 K, CD<sub>2</sub>Cl<sub>2</sub>). \* = CD<sub>2</sub>Cl<sub>2</sub> (in <sup>13</sup>C{<sup>1</sup>H}) or residual CHDCl<sub>2</sub> (in <sup>1</sup>H).

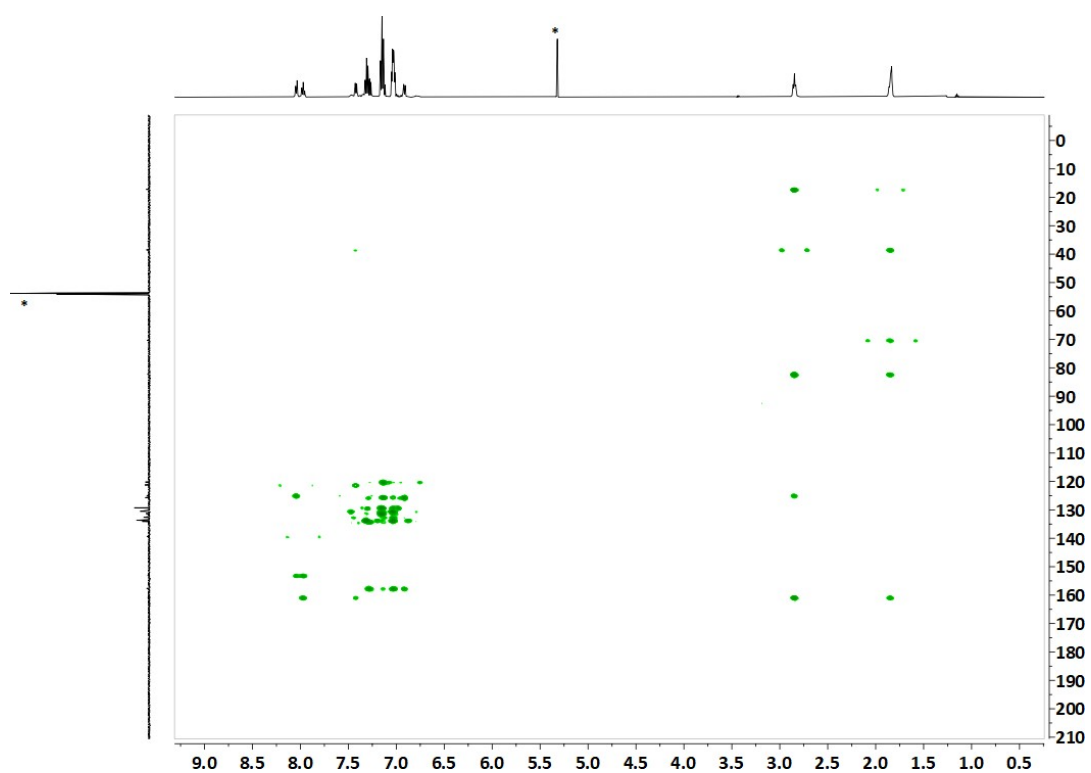

Fig. S15. HMBC spectrum of [Cu(POP)(1)][PF<sub>6</sub>]. (500 MHz <sup>1</sup>H, 126 MHz <sup>13</sup>C{<sup>1</sup>H}, 298 K, CD<sub>2</sub>Cl<sub>2</sub>). \* = CD<sub>2</sub>Cl<sub>2</sub> (in <sup>13</sup>C{<sup>1</sup>H}) or residual CHDCl<sub>2</sub> (in <sup>1</sup>H).

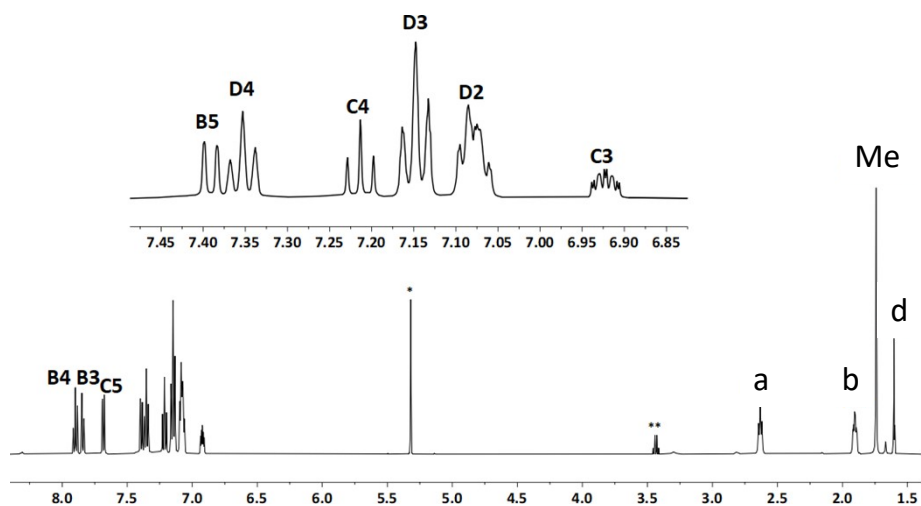

Fig. S16.  $^1\text{H}$  NMR spectrum (500 MHz, 298 K,  $\text{CD}_2\text{Cl}_2$ ) of  $[\text{Cu}(\text{xantphos})(\mathbf{1})][\text{PF}_6]$ . Scale given in  $\delta$  / ppm. \* = residual  $\text{CHDCl}_2$ .

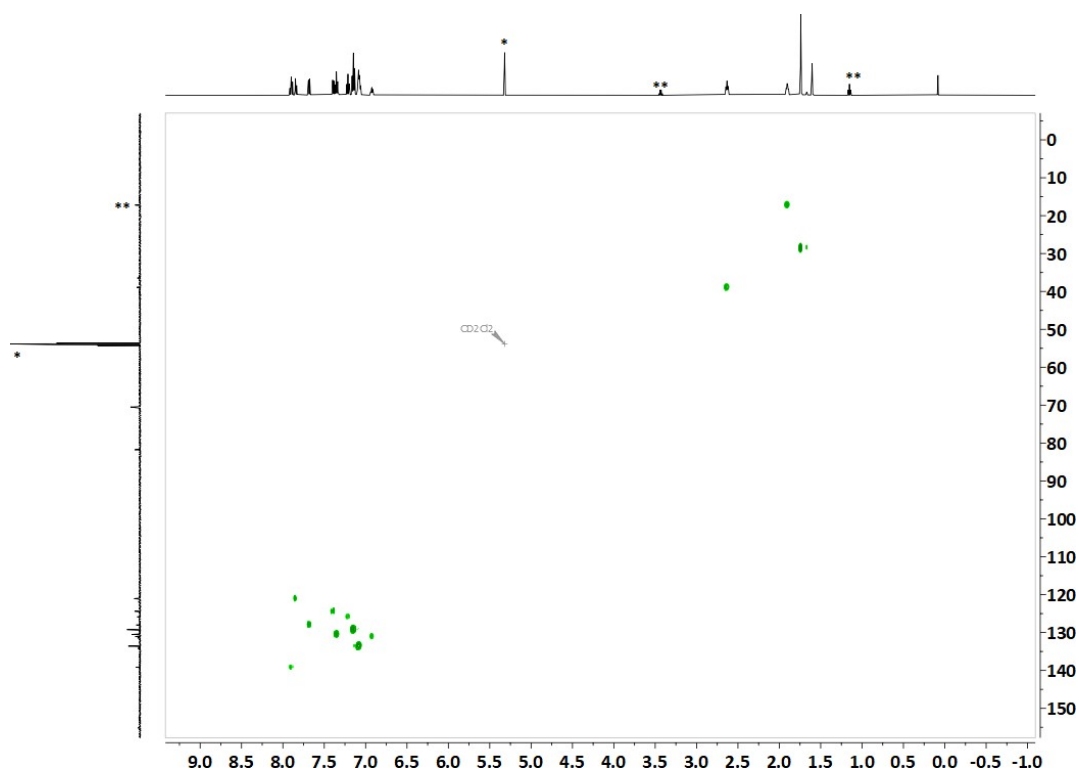

Fig. S17. HMQC spectrum of  $[\text{Cu}(\text{xantphos})(\mathbf{1})][\text{PF}_6]$ . (500 MHz  $^1\text{H}$ , 126 MHz  $^{13}\text{C}\{^1\text{H}\}$ , 298 K,  $\text{CD}_2\text{Cl}_2$ ). \* =  $\text{CD}_2\text{Cl}_2$  (in  $^{13}\text{C}\{^1\text{H}\}$ ) or residual  $\text{CHDCl}_2$  (in  $^1\text{H}$ ).



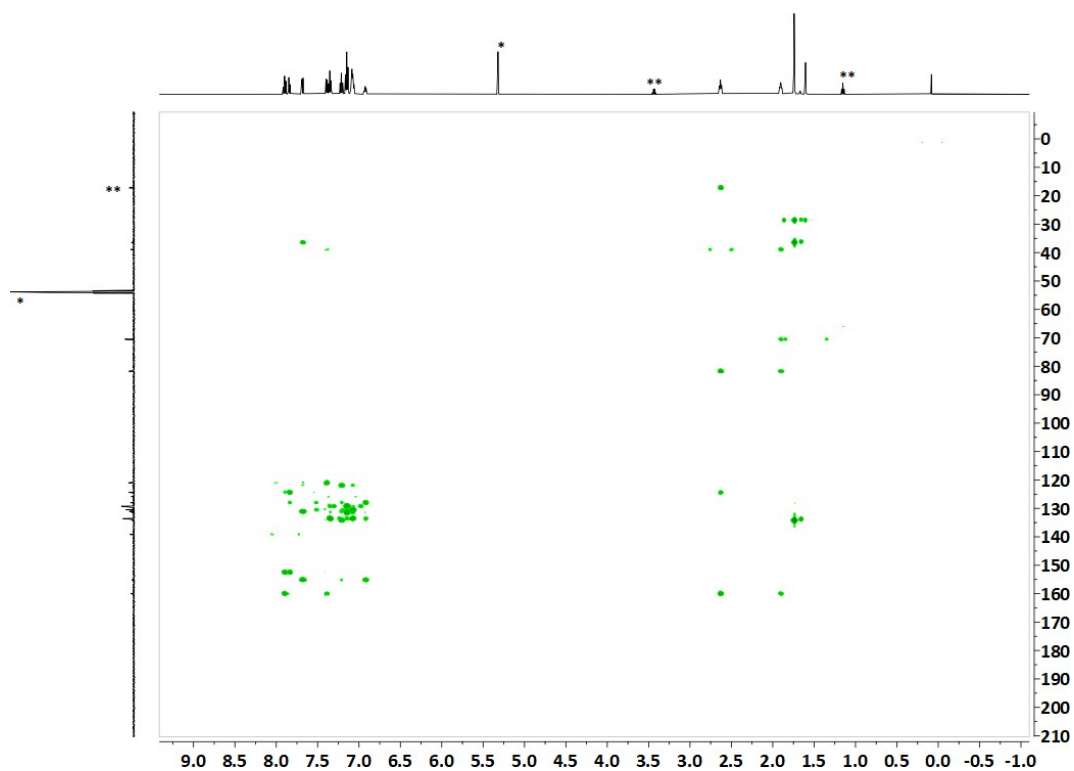

Fig. S18. HMBC spectrum of  $[\text{Cu}(\text{xantphos})(\mathbf{1})][\text{PF}_6]$ . (500 MHz  $^1\text{H}$ , 126 MHz  $^{13}\text{C}\{^1\text{H}\}$ , 298 K,  $\text{CD}_2\text{Cl}_2$ ). \* =  $\text{CD}_2\text{Cl}_2$  (in  $^{13}\text{C}\{^1\text{H}\}$ ) or residual  $\text{CH}_2\text{Cl}_2$  (in  $^1\text{H}$ ).

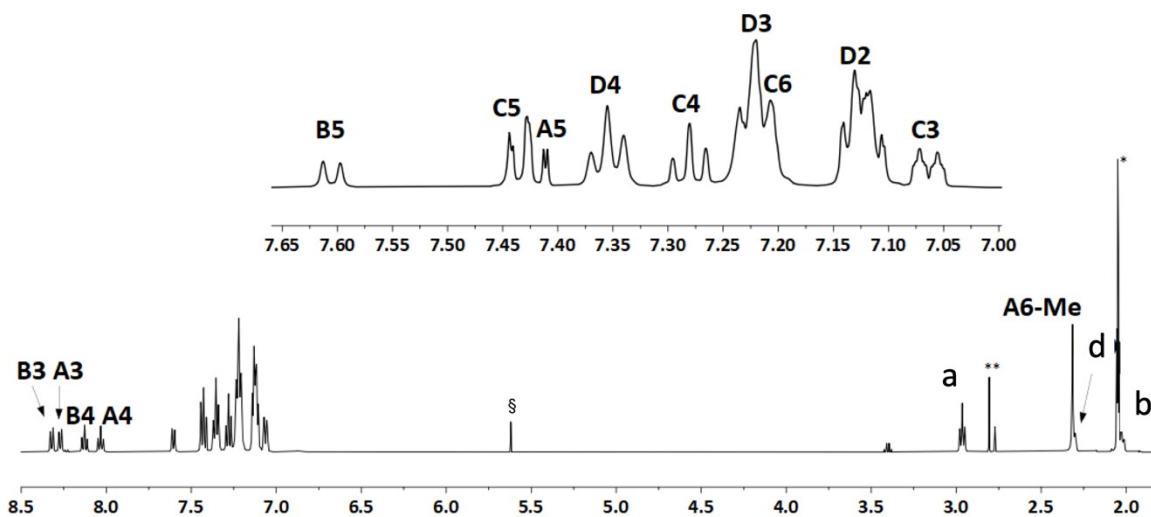

Fig. S19.  $^1\text{H}$  NMR spectrum (500 MHz, 298 K, acetone- $d_6$ ) of  $[\text{Cu}(\text{POP})(\mathbf{2})][\text{PF}_6]$ . Scale given in  $\delta$ /ppm. \* = acetone- $d_5$ . \*\* =  $\text{H}_2\text{O}$  and HOD. § =  $\text{CH}_2\text{Cl}_2$ .

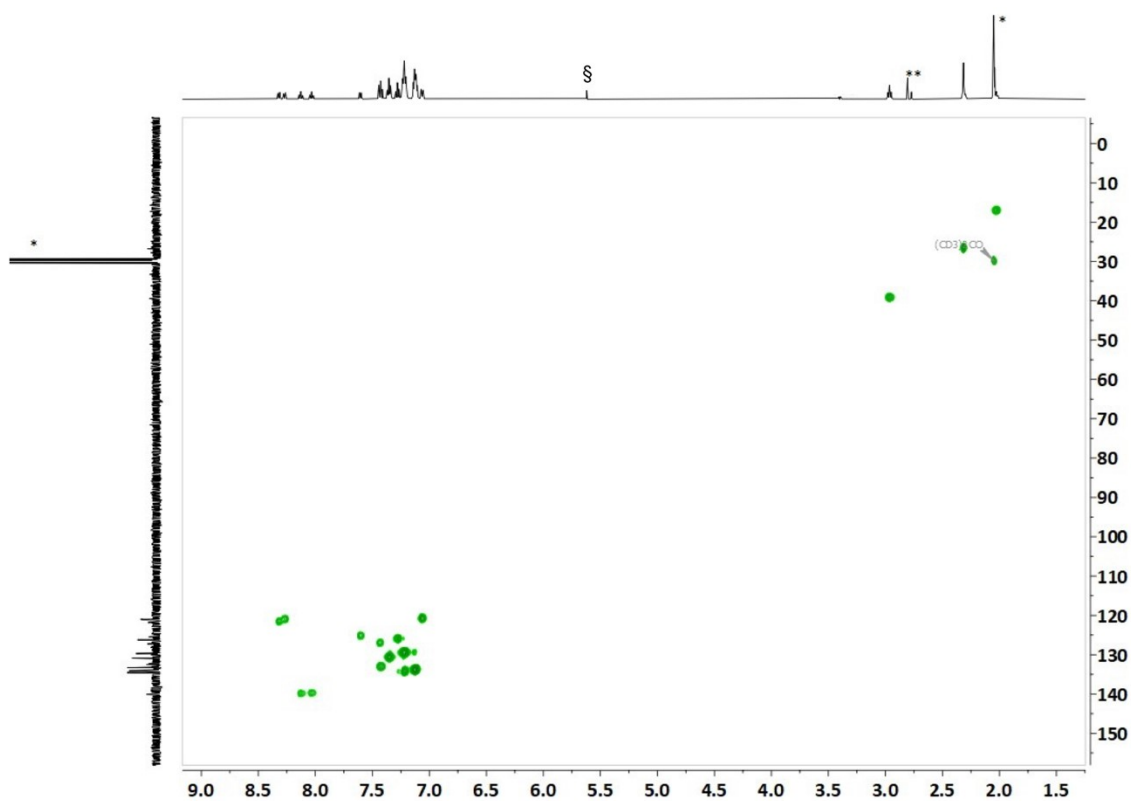

Fig. S20. HMQC spectrum of [Cu(POP)(2)][PF<sub>6</sub>]. (500 MHz <sup>1</sup>H, 126 MHz <sup>13</sup>C{<sup>1</sup>H}, 298 K, acetone-*d*<sub>6</sub>). \* = acetone-*d*<sub>6</sub> (in <sup>13</sup>C{<sup>1</sup>H}) or residual acetone-*d*<sub>5</sub> (in <sup>1</sup>H). \*\* = H<sub>2</sub>O and HOD. § = CH<sub>2</sub>Cl<sub>2</sub>.

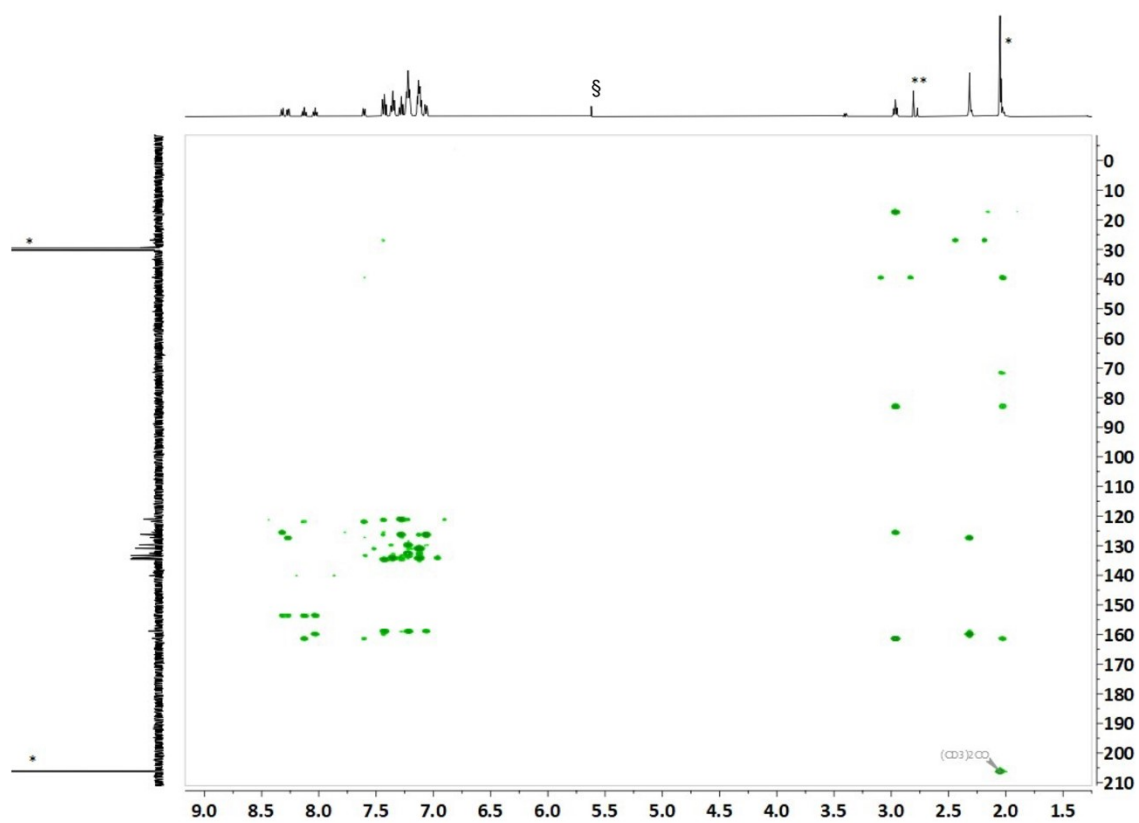

Fig. S21. HMBC spectrum of [Cu(POP)(2)][PF<sub>6</sub>]. (500 MHz <sup>1</sup>H, 126 MHz <sup>13</sup>C{<sup>1</sup>H}, 298 K, acetone-*d*<sub>6</sub>). \* = acetone-*d*<sub>6</sub> (in <sup>13</sup>C{<sup>1</sup>H}) or residual acetone-*d*<sub>5</sub> (in <sup>1</sup>H). \*\* = H<sub>2</sub>O and HOD. § = CH<sub>2</sub>Cl<sub>2</sub>.

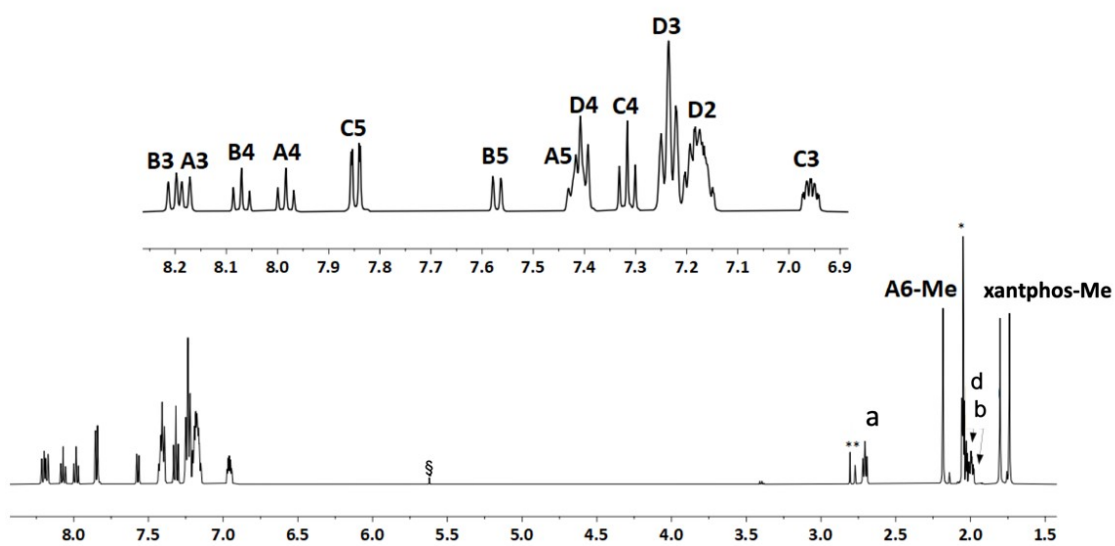

Fig. S22.  $^1\text{H}$  NMR spectrum (500 MHz, 298 K, acetone- $d_6$ ) of  $[\text{Cu}(\text{xantphos})(\mathbf{2})][\text{PF}_6]$ . Scale given in  $\delta$  / ppm. \* = acetone- $d_5$ . \*\* =  $\text{H}_2\text{O}$  and HOD. § =  $\text{CH}_2\text{Cl}_2$ .

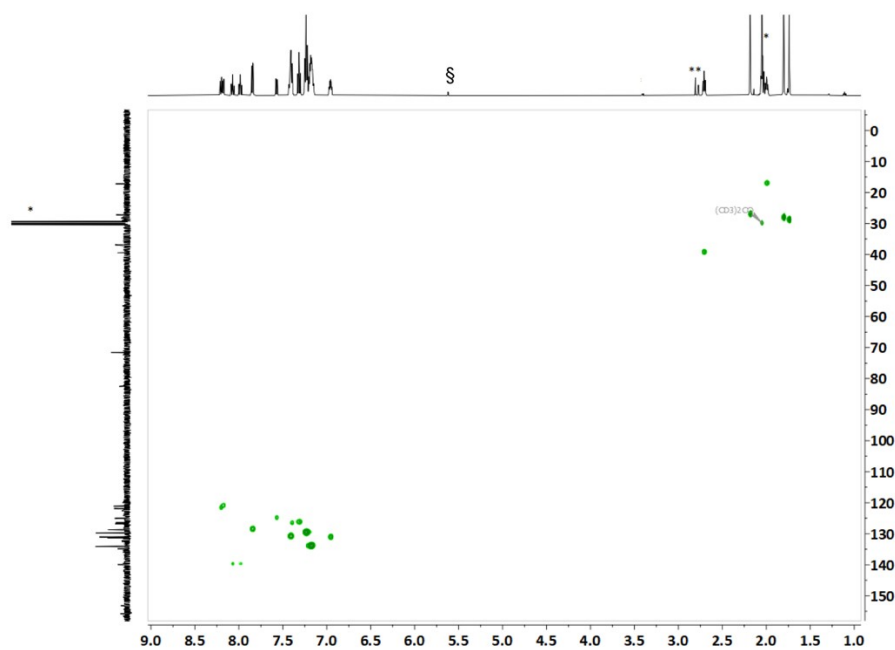

Fig. S23. HMQC spectrum of  $[\text{Cu}(\text{xantphos})(\mathbf{2})][\text{PF}_6]$ . (500 MHz  $^1\text{H}$ , 126 MHz  $^{13}\text{C}\{^1\text{H}\}$ , 298 K, acetone- $d_6$ ). \* = acetone- $d_6$  (in  $^{13}\text{C}\{^1\text{H}\}$ ) or residual acetone- $d_5$  (in  $^1\text{H}$ ). \*\* =  $\text{H}_2\text{O}$  and HOD. § =  $\text{CH}_2\text{Cl}_2$ .

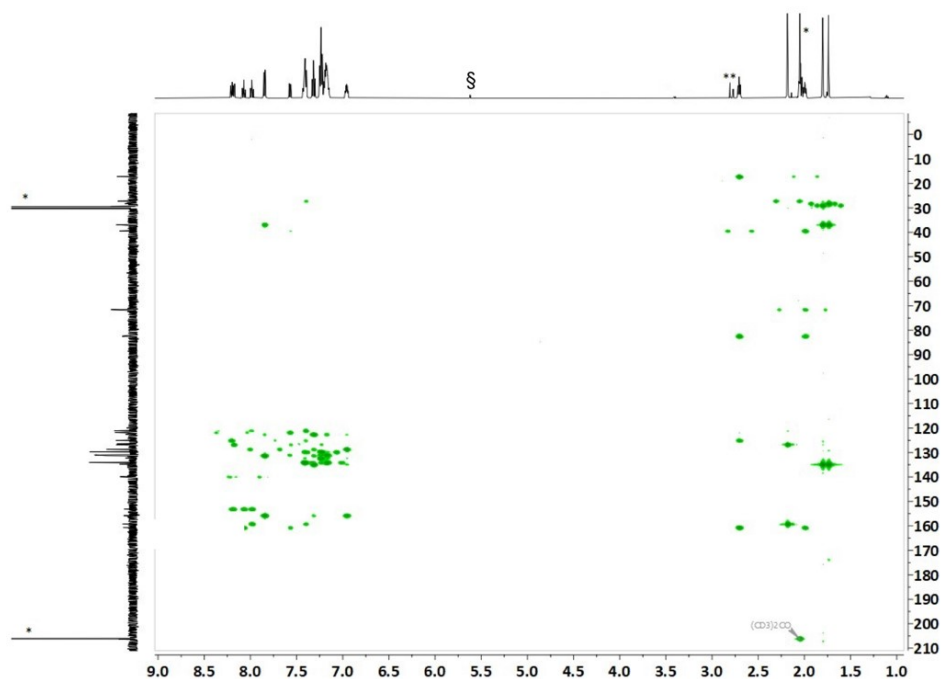

Fig. S24. HMBC spectrum of  $[\text{Cu}(\text{xantphos})(\mathbf{2})][\text{PF}_6]$ . (500 MHz  $^1\text{H}$ , 126 MHz  $^{13}\text{C}\{^1\text{H}\}$ , 298 K, acetone- $d_6$ ). \* = acetone- $d_6$  (in  $^{13}\text{C}\{^1\text{H}\}$ ) or residual acetone- $d_5$  (in  $^1\text{H}$ ). \*\* =  $\text{H}_2\text{O}$  and HOD. § =  $\text{CH}_2\text{Cl}_2$ .

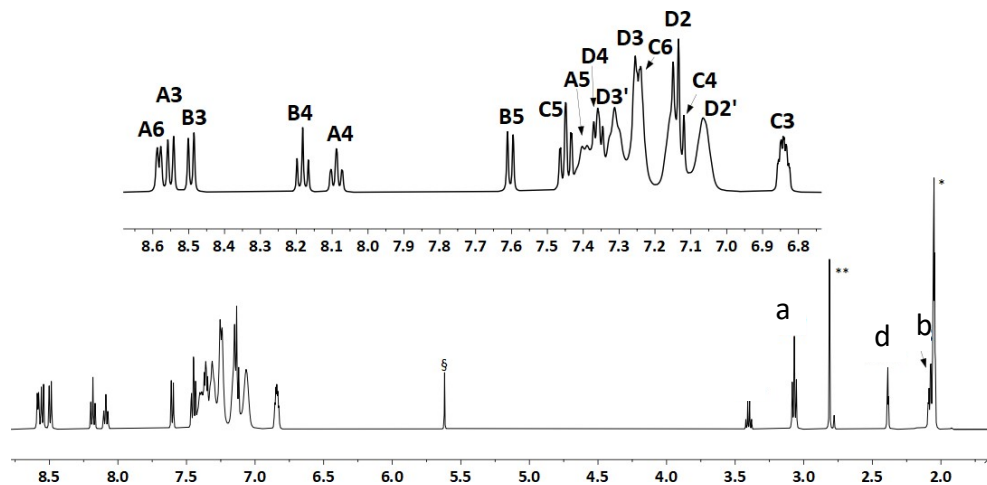

Fig. S25.  $^1\text{H}$  NMR spectrum (500 MHz, 298 K, acetone- $d_6$ ) of  $[\text{Cu}(\text{POP})(\mathbf{3})][\text{PF}_6]$ . Scale given in  $\delta$  / ppm. \* residual acetone- $d_5$ . § =  $\text{CH}_2\text{Cl}_2$ . \*\* =  $\text{H}_2\text{O}$  and HOD. The sample also contains a small amount of  $\text{Et}_2\text{O}$ .

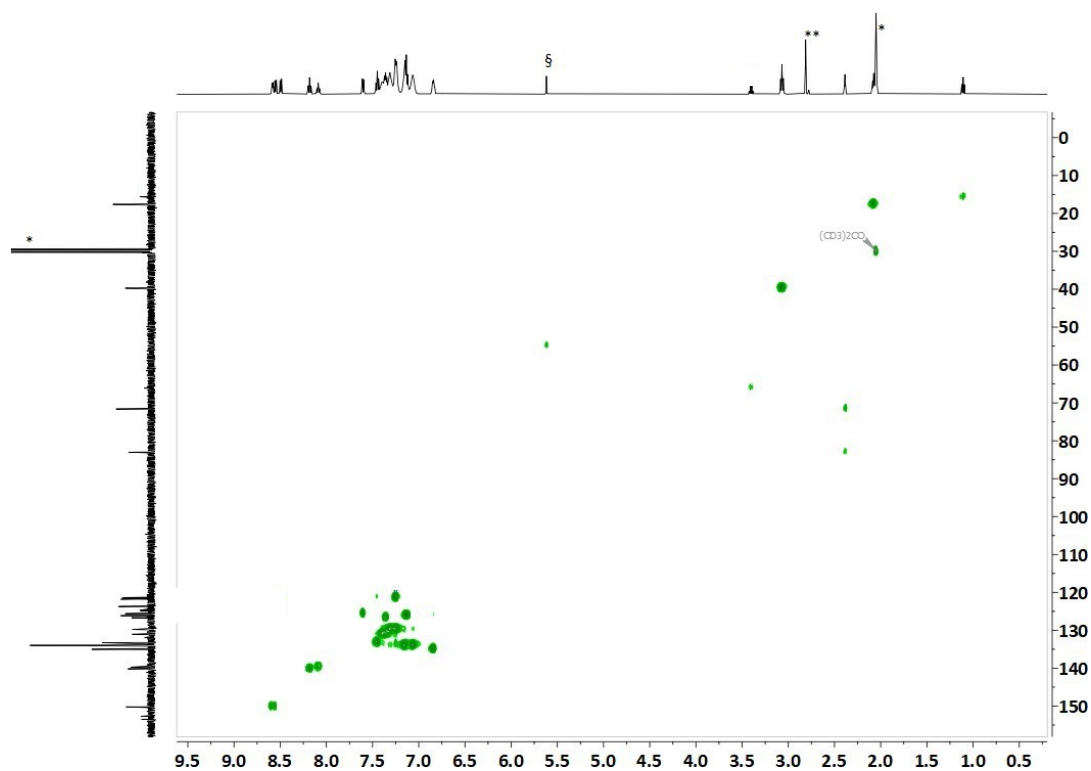

Fig. S26. HMQC spectrum of  $[\text{Cu}(\text{POP})(\mathbf{3})][\text{PF}_6]$ . (500 MHz  $^1\text{H}$ , 126 MHz  $^{13}\text{C}\{^1\text{H}\}$ , 298 K, acetone- $d_6$ ). \* = acetone- $d_6$  (in  $^{13}\text{C}\{^1\text{H}\}$ ) or residual acetone- $d_5$  (in  $^1\text{H}$ ). \*\* =  $\text{H}_2\text{O}$  and HOD. § =  $\text{CH}_2\text{Cl}_2$ . The sample also contains a small amount of  $\text{Et}_2\text{O}$ .

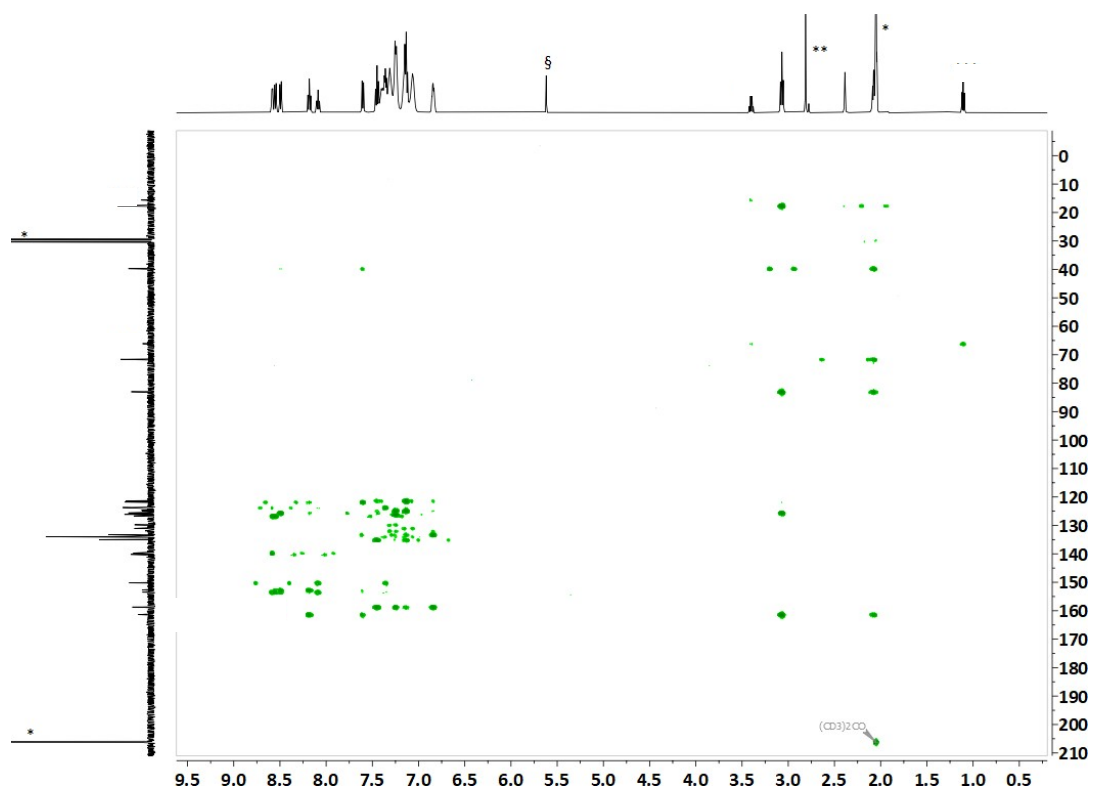

Fig. S27. HMBC spectrum of  $[\text{Cu}(\text{POP})(\mathbf{3})][\text{PF}_6]$ . (500 MHz  $^1\text{H}$ , 126 MHz  $^{13}\text{C}\{^1\text{H}\}$ , 298 K, acetone- $d_6$ ). \* = acetone- $d_6$  (in  $^{13}\text{C}\{^1\text{H}\}$ ) or residual acetone- $d_5$  (in  $^1\text{H}$ ). \*\* =  $\text{H}_2\text{O}$  and HOD.  $\delta = \text{CH}_2\text{Cl}_2$ . The sample also contains a small amount of  $\text{Et}_2\text{O}$ .

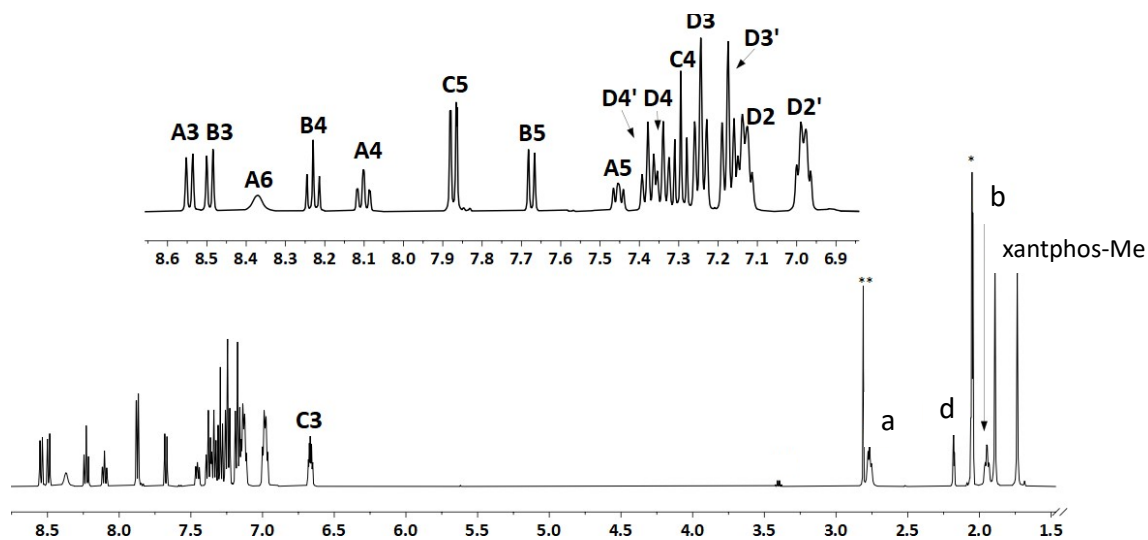

Fig. S28.  $^1\text{H}$  NMR spectrum (500 MHz, 298 K, acetone- $d_6$ ) of  $[\text{Cu}(\text{xantphos})(\mathbf{3})][\text{PF}_6]$ . Scale given in  $\delta$  / ppm. \* = residual acetone- $d_5$ . \*\* =  $\text{H}_2\text{O}$ .

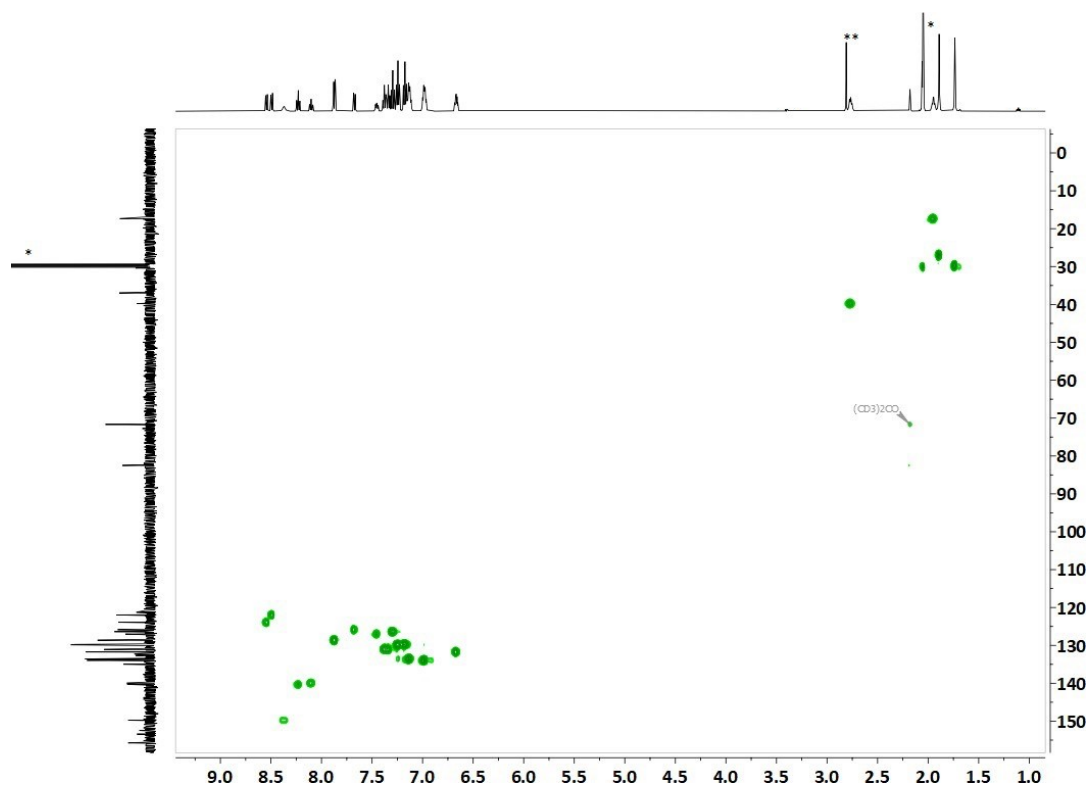

Fig. S29. HMQC spectrum of  $[\text{Cu}(\text{xantphos})(\mathbf{3})][\text{PF}_6]$ . (500 MHz  $^1\text{H}$ , 126 MHz  $^{13}\text{C}\{^1\text{H}\}$ , 298 K, acetone- $d_6$ ). \* = acetone- $d_6$  (in  $^{13}\text{C}\{^1\text{H}\}$ ) or residual acetone- $d_5$  (in  $^1\text{H}$ ). \*\* =  $\text{H}_2\text{O}$ .

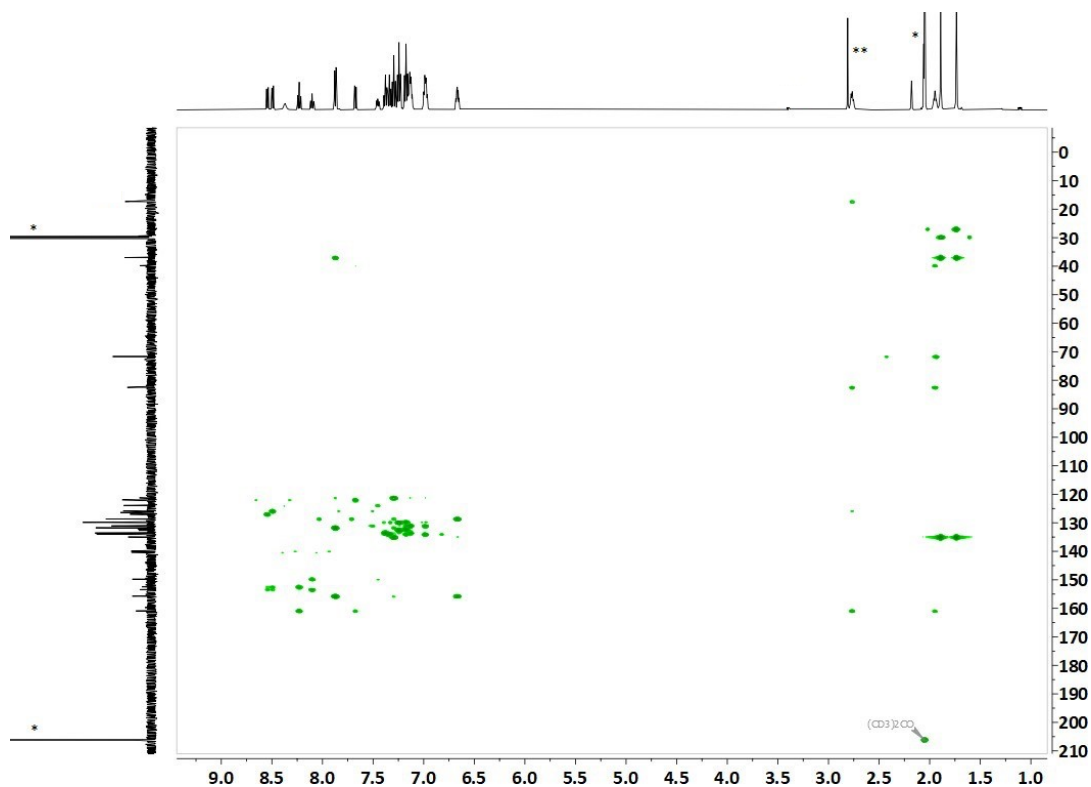

Fig. S30. HMBC spectrum of [Cu(xantphos)(**3**)] $[\text{PF}_6]$ . (500 MHz  $^1\text{H}$ , 126 MHz  $^{13}\text{C}\{^1\text{H}\}$ , 298 K, acetone- $d_6$ ). \* = acetone- $d_6$  (in  $^{13}\text{C}\{^1\text{H}\}$ ) or residual acetone- $d_5$  (in  $^1\text{H}$ ). \*\* =  $\text{H}_2\text{O}$ .

Table S1. Excited state lifetimes from a biexponential fit<sup>a</sup> of the [Cu(N<sup>N</sup>)(P<sup>P</sup>)] $[\text{PF}_6]$  complexes as powders.<sup>a</sup>

| Complex Cation                             | $\tau_1 / \mu\text{s}$ | $A_1$ | $\tau_2 / \mu\text{s}$ | $A_2$ | $\langle \tau \rangle / \mu\text{s}$ |
|--------------------------------------------|------------------------|-------|------------------------|-------|--------------------------------------|
| [Cu( <b>1</b> )(POP)] $[\text{PF}_6]$      | 12                     | 0.89  | 1.6                    | 0.08  | 11.1                                 |
| [Cu( <b>1</b> )(xantphos)] $[\text{PF}_6]$ | 14                     | 0.87  | 1.7                    | 0.09  | 12.8                                 |
| [Cu( <b>2</b> )(POP)] $[\text{PF}_6]$      | 18.7                   | 0.90  | 0.9                    | 0.05  | 17.8                                 |
| [Cu( <b>2</b> )(xantphos)] $[\text{PF}_6]$ | 11.3                   | 0.75  | 2.2                    | 0.19  | 9.5                                  |
| [Cu( <b>3</b> )(POP)] $[\text{PF}_6]$      | 4.3                    | 0.70  | 1.7                    | 0.27  | 3.5                                  |
| [Cu( <b>3</b> )(xantphos)] $[\text{PF}_6]$ | 10.5                   | 0.86  | 2.2                    | 0.11  | 9.6                                  |

<sup>a</sup> The excited state lifetime  $\langle \tau \rangle$  is calculated from the equation  $\frac{\sum A_i \tau_i}{\sum A_i}$  where  $A_i$  is the pre-exponential factor of the lifetime  $\tau_i$ .
